# Supplementary material for: Characterising a rock fracture rough surface using spatial continuity and kriging: a new approach to meshing coupled thermo–hydraulic–mechanical–chemical (THMC) models
Source: Copernicus journal article supplement (doi:10.5194/sand-2-107-2023), 2023-09-06
Supplement: Supplementary file 1 [file sand-2-107-2023-supplement.zip]

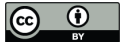

*Supplement of*

## **Characterising a rock fracture rough surface using spatial continuity and kriging: a new approach to meshing coupled thermo–hydraulic–mechanical–chemical (THMC) models**

**Gonçalo B. Cunha and Christopher Ian McDermott**

*Correspondence to:* Gonçalo B. Cunha (g.cunha@ed.ac.uk)

- sand-2-107-2023-supplement-title-page.pdf
- sand-2023-7-supplement-version2.pdf
- sand-2023-7\_SaND\_GoncaloCunha\_UoE -supplement.pdf

The copyright of individual parts of the supplement might differ from the article licence.
